# Supplementary material for: Approximate Mortality Risks between Hyperuricemia and Diabetes in the United States
Source: PubMed Central journal article supplement (PMC6947281; doi:10.3390/jcm8122127), 2019-12-03
Supplement: jcm-08-02127-s001.pdf [file jcm-08-02127-s001.pdf]

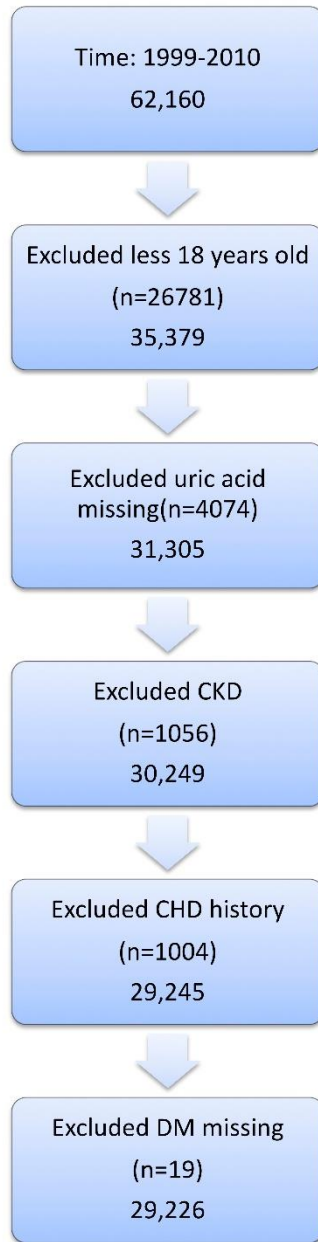

**Figure S1.** Flow chart of enrollment.

**Supplementary table 1. Stepwise analysis of relative HRs (95%CI) for the association between mortality risks and uric acid levels among adults without diabetes and with diabetes.**

|                               | <b>Non-DM</b>          |                 |                  |                   |
|-------------------------------|------------------------|-----------------|------------------|-------------------|
|                               | <5 (mg/dL)<br>N =11545 | 5-7<br>N =11895 | 7-9<br>N =3030   | ≥9<br>N =250      |
| All-cause mortality (N =1664) |                        |                 |                  |                   |
| univariate                    | 0.79(0.68-0.91)        | 1.0(reference)  | 1.33(1.10-1.62)* | 2.67(1.64-4.36)*  |
| Model1                        | 1.01(0.87-1.18)        | 1.0(reference)  | 1.37(1.10-1.71)* | 2.79(1.75-4.45)*  |
| Model2                        | 1.03(0.87-1.22)        | 1.0(reference)  | 1.43(1.15-1.79)* | 2.41(1.42-4.08)*  |
| CVD mortality (N =378)        |                        |                 |                  |                   |
| univariate                    | 0.91(0.70-1.17)        | 1.0(reference)  | 1.70(1.25-2.32)* | 4.22(1.67-10.65)* |
| Model1                        | 1.14(0.78-1.67)        | 1.0(reference)  | 1.73(1.18-2.52)* | 4.69(1.76-12.46)* |
| Model2                        | 1.22(0.82-1.82)        | 1.0(reference)  | 1.76(1.22-2.56)* | 5.06(1.69-15.15)* |
| Cancer death(N =436)          |                        |                 |                  |                   |
| univariate                    | 0.78(0.59-1.05)        | 1.0(reference)  | 1.29(0.97-1.71)  | 1.81(0.92-3.53)   |
| Model1                        | 1.09(0.79-1.51)        | 1.0(reference)  | 1.18(0.86-1.63)  | 1.65(0.86-3.19)   |
| Model2                        | 1.04(0.75-1.45)        | 1.0(reference)  | 1.25(0.9-1.73)   | 1.43(0.64-3.21)   |
| CVD or Cancer death (N =814)  |                        |                 |                  |                   |
| univariate                    | 0.83(0.68-1.02)        | 1.0(reference)  | 1.45(1.15-1.82)* | 2.73(1.40-5.32)*  |
| Model1                        | 1.11(0.86-1.43)        | 1.0(reference)  | 1.37(1.04-1.8)*  | 2.62(1.36-5.05)*  |
| Model2                        | 1.10(0.84-1.43)        | 1.0(reference)  | 1.42(1.08-1.87)* | 2.60(1.21-5.58)*  |
|                               |                        |                 | <b>DM</b>        |                   |
|                               | N =973                 | N =1141         | N =345           | N =47             |
| All-cause mortality (N =405)  |                        |                 |                  |                   |
| univariate                    | 1.21(0.87-1.69)        | 1.0(reference)  | 2.33(1.66-3.27)* | 2.04(0.92-4.53)   |
| Model1                        | 1.58(1.12-2.24)*       | 1.0(reference)  | 2.20(1.51-3.20)* | 1.96(0.84-4.55)   |
| Model2                        | 1.66(1.14-2.41)*       | 1.0(reference)  | 2.17(1.49-3.17)* | 2.10(0.87-5.06)   |
| CVD mortality (N =117)        |                        |                 |                  |                   |
| univariate                    | 0.81(0.44-1.48)        | 1.0(reference)  | 2.48(1.37-4.47)* | 0.49(0.10-2.45)   |
| Model1                        | 0.87(0.36-2.12)        | 1.0(reference)  | 2.43(1.25-4.76)* | 0.66(0.14-3.18)   |
| Model2                        | 0.91(0.38-2.18)        | 1.0(reference)  | 2.53(1.18-5.41)* | 0.89(0.18-4.50)   |
| Cancer death (N =84)          |                        |                 |                  |                   |
| univariate                    | 1.28(0.58-2.82)        | 1.0(reference)  | 1.88(0.94-3.78)  | 4.80(1.43-16.05)* |
| Model1                        | 2.22(0.86-5.76)        | 1.0(reference)  | 2.10(0.94-4.66)  | 4.53(0.98-20.96)  |
| Model2                        | 2.13(0.84-5.42)        | 1.0(reference)  | 2.13(0.88-5.12)  | 4.51(0.89-22.78)  |
| CVD or Cancer death (N =201)  |                        |                 |                  |                   |
| univariate                    | 1.00(0.62-1.62)        | 1.0(reference)  | 2.24(1.41-3.56)* | 2.32(0.81-6.65)   |

|        |                 |                |                  |                 |
|--------|-----------------|----------------|------------------|-----------------|
| Model1 | 1.36(0.78-2.38) | 1.0(reference) | 2.31(1.40-3.81)* | 2.15(0.63-7.36) |
| Model2 | 1.36(0.77-2.43) | 1.0(reference) | 2.30(1.34-3.96)* | 2.60(0.69-9.8)  |

---

<sup>a</sup>Data are weighted estimates.

Model1. Adjusted for BMI, sex, age, race, current smoking status. \* $P < 0.05$ .

Model2. Adjusted for BMI, sex, age, race, HDL-Cholesterol, current smoking status, SBP and Creatinine . \* $P < 0.05$ .

**Supplementary table 2.** Stepwise analysis of relative HRs (95%CI) of mortality risks compared with non-diabetes participants with UA 5-7mg/dL among participants without diabetes and with diabetes.

|                               | Non-DM                 |                 |                  |                   | DM                   |                  |                    |                   |
|-------------------------------|------------------------|-----------------|------------------|-------------------|----------------------|------------------|--------------------|-------------------|
|                               | <5 (mg/dL)<br>N =11545 | 5-7<br>N =11895 | 7-9<br>N =3030   | ≥9<br>N =250      | <5 (mg/dL)<br>N =973 | 5-7<br>N =1141   | 7-9<br>N =354      | ≥9<br>N =47       |
| All-cause mortality (N =2069) |                        |                 |                  |                   |                      |                  |                    |                   |
| univariate                    | 0.79(0.68-0.91)        | 1.0(reference)  | 1.33(1.1-1.62)*  | 2.67(1.64-4.36)*  | 3.18(2.45-4.13)*     | 2.63(1.98-3.49)* | 6.12(4.55-8.25)*   | 5.37(2.53-11.39)* |
| Model1                        | 1.04(0.89-1.21)        | 1.0(reference)  | 1.35(1.08-1.69)* | 2.75(1.73-4.37)*  | 1.98(1.53-2.57)*     | 1.31(0.97-1.78)  | 2.95(2.22-3.92)*   | 2.57(1.18-5.6)*   |
| Model2                        | 1.06(0.9-1.26)         | 1.0(reference)  | 1.4(1.12-1.75)*  | 2.35(1.39-3.96)*  | 2.01(1.55-2.62)*     | 1.3(0.95-1.76)   | 2.87(2.14-3.85)*   | 2.79(1.28-6.08)*  |
| CVD mortality (N =495)        |                        |                 |                  |                   |                      |                  |                    |                   |
| univariate                    | 0.9(0.7-1.17)          | 1.0(reference)  | 1.7(1.25-2.33)*  | 4.21(1.66-10.64)* | 3.71(2.04-6.76)*     | 4.56(2.92-7.11)* | 11.29(6.66-19.14)* | 2.13(0.46-10.01)  |
| Model1                        | 1.18(0.83-1.67)        | 1.0(reference)  | 1.7(1.16-2.51)*  | 4.58(1.71-12.24)* | 1.98(1.01-3.88)*     | 2.24(1.27-3.96)* | 5.28(2.87-9.73)*   | 1.41(0.33-5.98)   |
| Model2                        | 1.23(0.86-1.76)        | 1.0(reference)  | 1.74(1.18-2.57)* | 5.07(1.71-15.04)* | 2.21(1.14-4.28)*     | 2.25(1.25-4.06)* | 4.99(2.48-10.03)*  | 1.66(0.42-6.6)    |
| Cancer death (N =520)         |                        |                 |                  |                   |                      |                  |                    |                   |
| univariate                    | 0.78(0.59-1.05)        | 1.0(reference)  | 1.29(0.97-1.72)  | 1.81(0.93-3.54)   | 2.38(1.36-4.19)*     | 1.9(1.11-3.23)*  | 3.54(1.9-6.59)*    | 9.31(3.03-28.58)* |
| Model1                        | 1.13(0.82-1.55)        | 1.0(reference)  | 1.17(0.85-1.61)  | 1.66(0.86-3.2)    | 1.56(0.86-2.84)      | 0.79(0.46-1.34)  | 1.55(0.76-3.16)    | 3.29(0.78-13.92)  |
| Model2                        | 1.07(0.77-1.49)        | 1.0(reference)  | 1.23(0.88-1.71)  | 1.43(0.64-3.19)   | 1.45(0.77-2.72)      | 0.78(0.45-1.35)  | 1.54(0.75-3.17)    | 3.3(0.76-14.37)   |
| CVD or Cancer death (N =1015) |                        |                 |                  |                   |                      |                  |                    |                   |
| univariate                    | 0.83(0.68-1.02)        | 1.0(reference)  | 1.45(1.15-1.82)* | 2.73(1.4-5.32)*   | 2.89(1.95-4.27)*     | 2.9(2.06-4.09)*  | 6.49(4.33-9.71)*   | 6.62(2.45-17.89)* |
| Model1                        | 1.14(0.88-1.47)        | 1.0(reference)  | 1.35(1.03-1.77)* | 2.61(1.35-5.03)*  | 1.69(1.16-2.47)*     | 1.3(0.91-1.85)   | 2.89(1.87-4.46)*   | 2.64(0.81-8.61)   |
| Model2                        | 1.13(0.86-1.47)        | 1.0(reference)  | 1.4(1.06-1.84)*  | 2.58(1.21-5.54)*  | 1.69(1.14-2.51)*     | 1.28(0.89-1.84)  | 2.67(1.68-4.26)*   | 2.81(0.84-9.39)   |

<sup>a</sup>Data are weighted estimates.

Model1. Adjusted for BMI, gender, age, race, current smoking status. \* $P < 0.05$ .

Model2. Adjusted for BMI, gender, age, race, HDL-Cholesterol, current smoking status, SBP and Creatinine. \* $P < 0.05$ .

**Supplementary Table 3-1.** Relative HRs (95%CI) of mortality risks compared with non-diabetes participants with UA 5-7mg/dL among non-Hispanic white participants without diabetes and with diabetes.

| Non-Hispanic White           | Non-DM                |                |                  |                  | DM                   |                 |                   |                   |
|------------------------------|-----------------------|----------------|------------------|------------------|----------------------|-----------------|-------------------|-------------------|
|                              | <5 (mg/dL)<br>N =5312 | 5-7<br>N =5795 | 7-9<br>N =1522   | ≥9<br>N =98      | <5 (mg/dL)<br>N =312 | 5-7<br>N =424   | 7-9<br>N =135     | ≥9<br>N =15       |
| All-cause mortality (N=1185) | 1.11(0.90-1.37)       | 1.0(reference) | 1.49(1.15-1.94)* | 2.32(1.07-5.01)* | 1.99(1.46-2.72)*     | 1.19(0.83-1.71) | 3.37(2.35-4.84)*  | 4.32(1.81-10.34)* |
| CVD mortality (N=276)        | 1.43(0.92-2.22)       | 1.0(reference) | 1.68(1.04-2.70)* | 7.05(1.9-26.09)* | 2.49(1.15-5.36)*     | 1.34(0.60-3.01) | 6.63(3.08-14.26)* | No event          |
| Cancer death (N=289)         | 1.13(0.77-1.66)       | 1.0(reference) | 1.47(0.99-2.19)  | 0.44(0.06-3.00)  | 1.46(0.59-3.60)      | 0.91(0.46-1.82) | 2.11(0.88-5.09)   | 5.82(1.27-26.68)* |
| CVD or Cancer death (N=565)  | 1.23(0.90-1.69)       | 1.0(reference) | 1.54(1.09-2.19)* | 2.48(0.81-7.57)  | 1.80(1.09-2.97)*     | 1.06(0.64-1.74) | 3.73(2.15-6.46)*  | 4.02(0.92-17.53)  |

<sup>a</sup>Data are weighted estimates. Adjusted for BMI, gender, age, HDL-Cholesterol, current smoking status, SBP and creatinine. \**P* < 0.05.

**Supplementary Table 3-2.** Relative HRs (95%CI) of mortality risks compared with non-diabetes participants with UA 5-7mg/dL among non-Hispanic black participants without diabetes and with diabetes.

| Non-Hispanic Black          | Non-DM                |                |                 |                  | DM                   |                  |                  |                 |
|-----------------------------|-----------------------|----------------|-----------------|------------------|----------------------|------------------|------------------|-----------------|
|                             | <5 (mg/dL)<br>N =2106 | 5-7<br>N =2347 | 7-9<br>N =680   | ≥9<br>N =75      | <5 (mg/dL)<br>N =204 | 5-7<br>N =299    | 7-9<br>N =142    | ≥9<br>N =23     |
| All-cause mortality (N=412) | 0.68(0.45-1.04)       | 1.0(reference) | 1.31(0.91-1.9)  | 3.21(1.47-7.04)* | 1.84(1.12-3.03)*     | 1.37(0.91-2.04)  | 2.62(1.67-4.09)* | 0.96(0.29-3.22) |
| CVD mortality (N=92)        | 0.52(0.22-1.21)       | 1.0(reference) | 1.32(0.61-2.86) | 1.68(0.28-10.03) | 1.70(0.55-5.24)      | 2.50(1.07-5.87)* | 1.84(0.42-8.10)  | 2.31(0.59-9.00) |
| Cancer death (N=117)        | 0.69(0.31-1.53)       | 1.0(reference) | 0.76(0.45-1.27) | 3.26(1.25-8.48)* | 1.49(0.60-3.7)       | 0.27(0.08-0.88)  | 0.84(0.44-1.62)  | No event        |
| CVD or Cancer death (N=209) | 0.64(0.34-1.20)       | 1.0(reference) | 0.91(0.58-1.44) | 2.68(0.89-8.09)  | 1.53(0.77-3.04)      | 0.99(0.52-1.89)  | 1.12(0.53-2.37)  | 0.83(0.15-4.53) |

<sup>a</sup>Data are weighted estimates. Adjusted for BMI, gender, age, HDL-Cholesterol, current smoking status, SBP and creatinine. \**P* < 0.05.

**Supplementary Table 3-3.** Relative HRs (95%CI) of mortality risks compared with non-diabetes participants with UA 5-7mg/dL among participants of other races without diabetes and with diabetes.

| Other Races                 | Non-DM                |                |                  |                 | DM                   |                   |                 |                     |
|-----------------------------|-----------------------|----------------|------------------|-----------------|----------------------|-------------------|-----------------|---------------------|
|                             | <5 (mg/dL)<br>N =4127 | 5-7<br>N =3753 | 7-9<br>N =828    | ≥9<br>N =77     | <5 (mg/dL)<br>N =457 | 5-7<br>N =418     | 7-9<br>N =68    | ≥9<br>N =9          |
| All-cause mortality (N=472) | 1.26(0.87-1.84)       | 1.0(reference) | 0.99(0.53-1.84)  | 0.58(0.16-2.13) | 2.12(1.17-3.86)*     | 1.55(0.81-2.95)   | 1.70(0.59-4.91) | 1.48(0.16-13.98)    |
| CVD mortality (N=127)       | 1.49(0.56-3.96)       | 1.0(reference) | 3.20(1.21-8.47)* | 0.79(0.09-6.93) | 1.64(0.51-5.26)      | 8.19(2.66-25.22)* | 0.54(0.06-4.64) | 32.52(2.41-438.30)* |
| Cancer death (N=114)        | 1.18(0.41-3.43)       | 1.0(reference) | 0.20(0.05-0.74)  | 1.40(0.26-7.47) | 1.16(0.32-4.23)      | 0.77(0.24-2.47)   | 0.42(0.05-3.47) | No event            |
| CVD or Cancer death (N=241) | 1.26(0.6-2.63)        | 1.0(reference) | 1.05(0.42-2.58)  | 1.27(0.3-5.35)  | 1.31(0.50-3.40)      | 2.76(1.19-6.40)*  | 0.46(0.09-2.31) | 7.14(0.78-65.34)    |

<sup>a</sup>Data are weighted estimates. Adjusted for BMI, gender, age, HDL-Cholesterol, current smoking status, SBP and creatinine. \*P < 0.05.
